# Supplementary material
Source: Springer Nature journal article supplement (https://www.springermedizin.de/resource/supplementary/12875_2009_385_MOESM5_ESM.pdf/9434502)
Supplement: MOESM5 [file 9434502]

**Problems experienced  
by the family physician**

**Strategy used  
by the family physician**

**Objective**

|                                                                                                                                                                                                                                                                                                                                                 |                                                                                                                                                                                                                                                                                                                                                                                                                            |
|-------------------------------------------------------------------------------------------------------------------------------------------------------------------------------------------------------------------------------------------------------------------------------------------------------------------------------------------------|----------------------------------------------------------------------------------------------------------------------------------------------------------------------------------------------------------------------------------------------------------------------------------------------------------------------------------------------------------------------------------------------------------------------------|
| <p><b>Gaining sufficient insight</b><br/><i>Patients with reduced functional ability</i></p> <ul style="list-style-type: none"> <li>• Can not make contact and relate how they are</li> </ul> <p><i>Patients who are fixed in their ways</i></p> <ul style="list-style-type: none"> <li>• Do not make contact or relate how they are</li> </ul> | <p><b>Relying on information from the district nurse and others</b><br/><i>Family and neighbours and all home care providers</i></p> <ul style="list-style-type: none"> <li>• For getting information</li> </ul> <p><i>The district nurse</i></p> <ul style="list-style-type: none"> <li>• For investigation in the home</li> <li>• For information about medical status</li> <li>• For information from others</li> </ul> |
|-------------------------------------------------------------------------------------------------------------------------------------------------------------------------------------------------------------------------------------------------------------------------------------------------------------------------------------------------|----------------------------------------------------------------------------------------------------------------------------------------------------------------------------------------------------------------------------------------------------------------------------------------------------------------------------------------------------------------------------------------------------------------------------|

**Good enough insight**

|                                                                                                                                                                                                                                                                                                                                                                                                                                                                                                                                                                                                                                                 |                                                                                                                                                                                                                                                                                                                                                                                                                            |
|-------------------------------------------------------------------------------------------------------------------------------------------------------------------------------------------------------------------------------------------------------------------------------------------------------------------------------------------------------------------------------------------------------------------------------------------------------------------------------------------------------------------------------------------------------------------------------------------------------------------------------------------------|----------------------------------------------------------------------------------------------------------------------------------------------------------------------------------------------------------------------------------------------------------------------------------------------------------------------------------------------------------------------------------------------------------------------------|
| <p><b>Making adequate decisions</b><br/><i>Patients with complex conditions</i></p> <p>The basis for decisions is uncertain</p> <ul style="list-style-type: none"> <li>• Difficult to investigate</li> <li>• Ambiguous information</li> <li>• Hard to get medical advice</li> </ul> <p>The decision is problematic</p> <ul style="list-style-type: none"> <li>• Side effects from appropriate treatment</li> <li>• Patients approaching end of life</li> <li>• Patients with alcohol abuse</li> </ul> <p><i>Patients who are fixed in their ways</i></p> <ul style="list-style-type: none"> <li>• Do not comply with recommendations</li> </ul> | <p><b>Supporting close observation and follow-up by the district nurse and others</b><br/><i>Family and neighbours and all home care providers</i></p> <ul style="list-style-type: none"> <li>• Support of</li> <li>• Follow up of the situation</li> </ul> <p><i>The district nurse</i></p> <ul style="list-style-type: none"> <li>• Conduct close observation and assessment of patient's condition and risks</li> </ul> |
|                                                                                                                                                                                                                                                                                                                                                                                                                                                                                                                                                                                                                                                 | <p><b>Being constantly ready to change the goal of the treatment</b><br/><i>In accordance with interventions that are</i></p> <ul style="list-style-type: none"> <li>• Acceptable</li> <li>• Possible</li> </ul> <p>For the patient</p><br><ul style="list-style-type: none"> <li>• Possible</li> <li>• Appropriate</li> </ul> <p>For the family physician</p>                                                             |

**Adequate decisions**

|                                                                                                                                                                                                                                                                         |                                                                                                                                                                                                                                                                                                                                                                                                                      |
|-------------------------------------------------------------------------------------------------------------------------------------------------------------------------------------------------------------------------------------------------------------------------|----------------------------------------------------------------------------------------------------------------------------------------------------------------------------------------------------------------------------------------------------------------------------------------------------------------------------------------------------------------------------------------------------------------------|
| <p><b>Maintaining appropriate treatment</b><br/><i>Patients with reduced functional ability</i></p> <ul style="list-style-type: none"> <li>• Cannot handle the treatment</li> <li>• Cannot evaluate their condition</li> <li>• Cannot evaluate the treatment</li> </ul> | <p><b>Relying on the district nurse and others to provide treatment</b><br/><i>The district nurse, family and home care providers</i></p> <ul style="list-style-type: none"> <li>• Help the patient with the treatment</li> </ul> <p><i>The district nurse</i></p> <ul style="list-style-type: none"> <li>• Conduct close observation and assessment of the patient's condition and treatment in the home</li> </ul> |
|-------------------------------------------------------------------------------------------------------------------------------------------------------------------------------------------------------------------------------------------------------------------------|----------------------------------------------------------------------------------------------------------------------------------------------------------------------------------------------------------------------------------------------------------------------------------------------------------------------------------------------------------------------------------------------------------------------|

**Good enough treatment**
